# Supplementary material for: C2N: an excellent two-dimensional monolayer membrane for He separation
Source: Royal Society of Chemistry journal article supplement (doi:10.1039/c5ta05700k), 2015-01-01
Supplement: c5ta05700k1.pdf [file c5ta05700k1.pdf]

**Table S1** The SS and TS for the studied gases passing through C<sub>2</sub>N monolayer, and their interaction energies are in eV. Orange is He, magenta is Ne, green is Ar, gray is carbon, white is hydrogen and blue is nitrogen, red is oxygen, yellow is sulfur.

| Gas             | Property           | Stable State                                                                        | Transition State                                                                      |
|-----------------|--------------------|-------------------------------------------------------------------------------------|---------------------------------------------------------------------------------------|
| He              | Top View           | 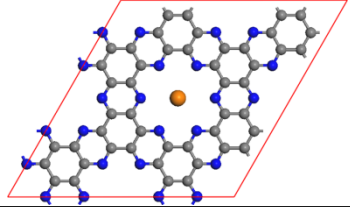   |    |
|                 | Side View          |    |    |
|                 | Interaction Energy | -0.06 eV                                                                            | 0.07 eV                                                                               |
| Ne              | Top View           |    |    |
|                 | Side View          |    |    |
|                 | Interaction Energy | -0.08 eV                                                                            | 0.26 eV                                                                               |
| CO <sub>2</sub> | Top View           |  |  |
|                 | Side View          |  |  |
|                 | Interaction Energy | -0.19 eV                                                                            | 0.47 eV                                                                               |
| N <sub>2</sub>  | Top View           |  |  |
|                 | Side View          |  |  |
|                 | Interaction Energy | -0.17 eV                                                                            | 0.70 eV                                                                               |
| Ar              | Top View           |  |  |
|                 | Side View          |  |  |

|                  |                    |          |         |
|------------------|--------------------|----------|---------|
|                  | Interaction Energy | -0.09 eV | 1.15 eV |
| H <sub>2</sub> O | Top View           |          |         |
|                  | Side View          |          |         |
|                  | Interaction Energy | -0.59 eV | 0.05 eV |
| H <sub>2</sub> S | Top View           |          |         |
|                  | Side View          |          |         |
|                  | Interaction Energy | -1.20 eV | 0.65 eV |
| CH <sub>4</sub>  | Top View           |          |         |
|                  | Side View          |          |         |
|                  | Interaction Energy | -0.07 eV | 1.96 eV |
| O <sub>2</sub>   | Top View           |          |         |
|                  | Side View          |          |         |
|                  | Interaction Energy | -0.11 eV | 0.68 eV |

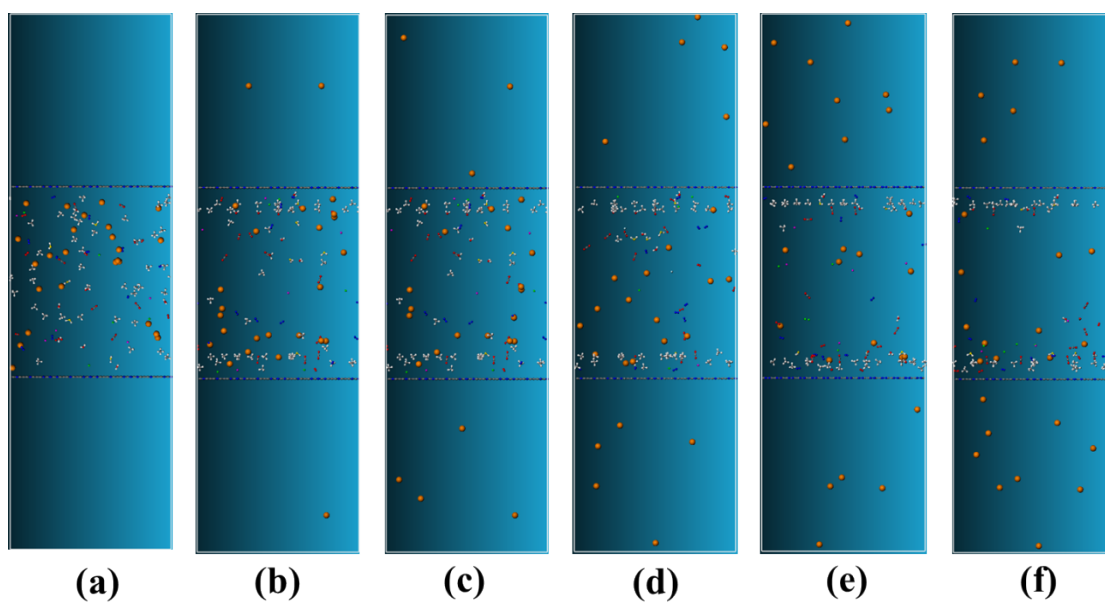

**Fig. S1** Snapshots of configuration of the gas mixture permeating through  $C_2N$  monolayer at different temperatures. (a) the initial configuration, (b)-(f) the configuration after 1 ns simulation at different temperature. (b) 200 K, (c) 300 K, (d) 400 K, (e) 500 K and (f) 600 K. The  $C_2N$  monolayer was constructed with dimensions of  $58.28 \text{ \AA} \times 57.67 \text{ \AA}$ .
